# Supplementary material
Source: MDPI journal article supplement (https://www.mdpi.com/2076-3417/9/24/5386)
Supplement: s1 [file s1]

## Supplementary Information

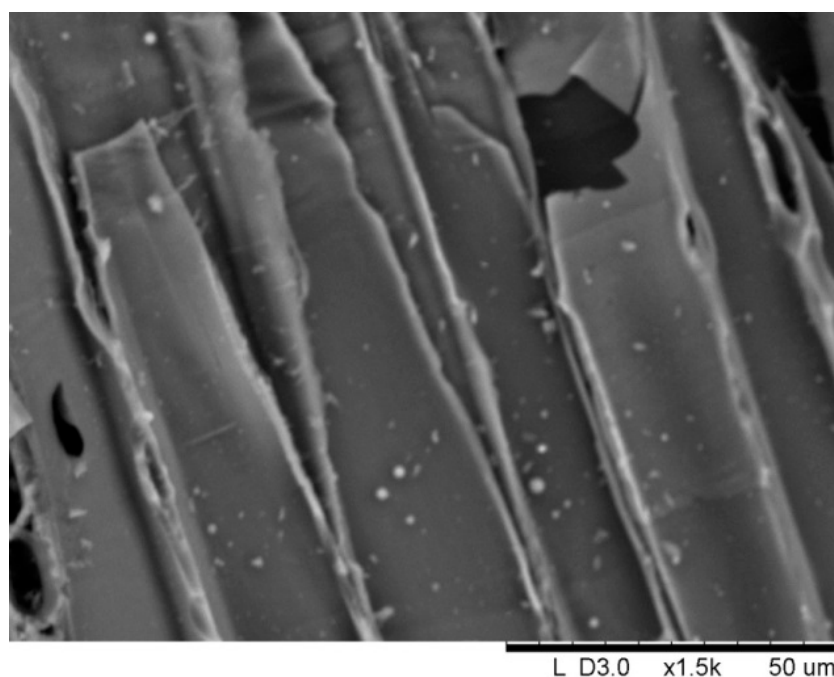

**Figure S1.** Scanning electron microscope image of the surface of the pine/spruce biochar used as filter material in the two stage VFF-HFF filter system. Magnification factor  $\times 1500$ .

**Table S1.** Regression summary for Tot-N removal as dependent variable 190326.sta.  $R = 0.325$ ,  $R^2 = 0.106$ , adjusted  $R^2 = 0.095$ ,  $F(1,83) = 9.81$ ,  $p < 0.002$ , std. error of estimate = 13.17.

| N = 85                                          |      |           |       |           |       |         |
|-------------------------------------------------|------|-----------|-------|-----------|-------|---------|
|                                                 | b *  | Std. Err. | b     | Std. Err. | t(83) | p-Value |
| Intercept                                       |      |           | 55.57 | 4.23      | 13.12 | 0.00    |
| OLR ( $\text{g m}^{-2} \cdot \text{day}^{-1}$ ) | 0.32 | 0.10      | 0.91  | 0.29      | 3.13  | 0.002   |
